# Supplementary material for: Shape-enhanced ammonia electro-oxidation property of a cubic platinum nanocrystal catalyst prepared by surfactant-free synthesis
Source: Royal Society of Chemistry journal article supplement (doi:10.1039/c3ta13641h), 2013-01-01
Supplement: c3ta13641h.pdf [file c3ta13641h.pdf]

# Supporting Information

## **Shape-Enhanced Ammonia Electro-Oxidation Property of Cubic Platinum Nanocrystals Catalyst Made by Surfactant-Free Synthesis**

*Changlin Zhang, Sang Youp Hwang, Zhenmeng Peng\**

Department of Chemical & Biomolecular Engineering, The University of Akron,

Whitby Hall 201A, Akron, OH 44325

\* CORRESPONDING AUTHOR

E-mail: [zpeng@uakron.edu](mailto:zpeng@uakron.edu)

Office: (330)-972-5810

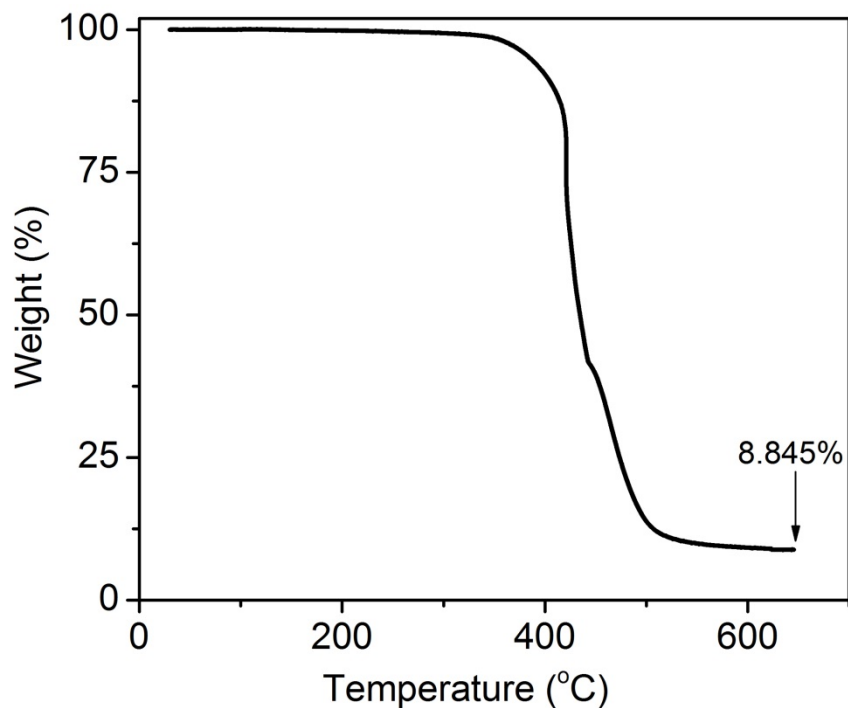

**Figure S1.** Thermal gravity analysis of the PtNCs/C sample by heating the samples at 10°C /min to 650 °C in a flow of air (60 cm<sup>2</sup>/min).

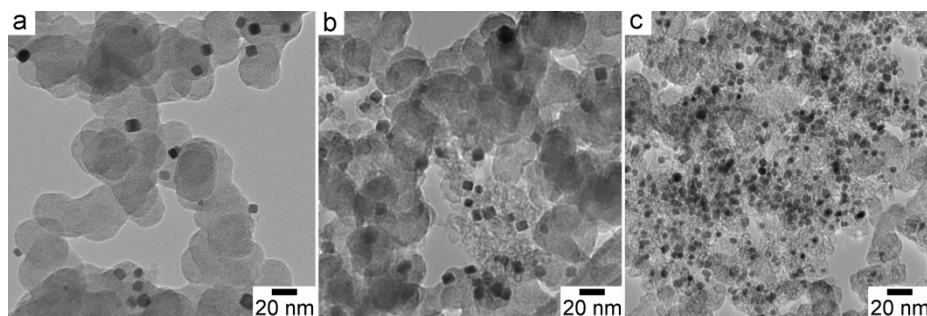

**Figure S2.** TEM of prepared Pt/C using carbon support which was pre-treated at different temperatures: (a) 250 °C, (b) 350 °C, and (c) 400 °C. Pt reduction condition: H<sub>2</sub>/CO = 5/120 cm<sup>3</sup>/min, T = 200°C, and t = 1 h.

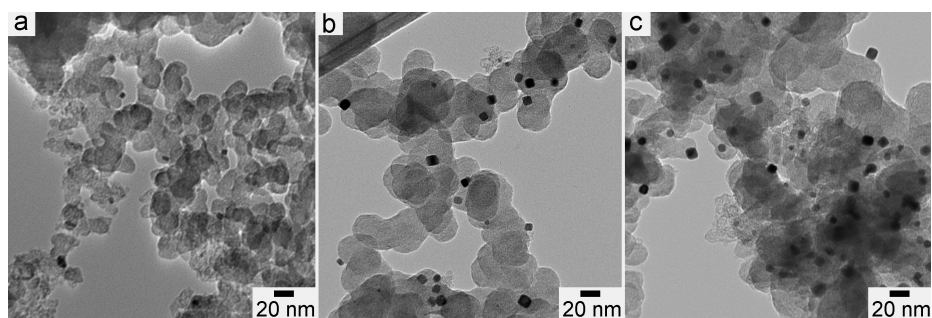

**Figure S3.** TEM of Pt/C samples produced at (a) 150 °C, (b) 250 °C, and (c) 300 °C. Pt reduction condition:  $\text{H}_2/\text{CO} = 5/120 \text{ cm}^3/\text{min}$ , and  $t = 1 \text{ h}$ .

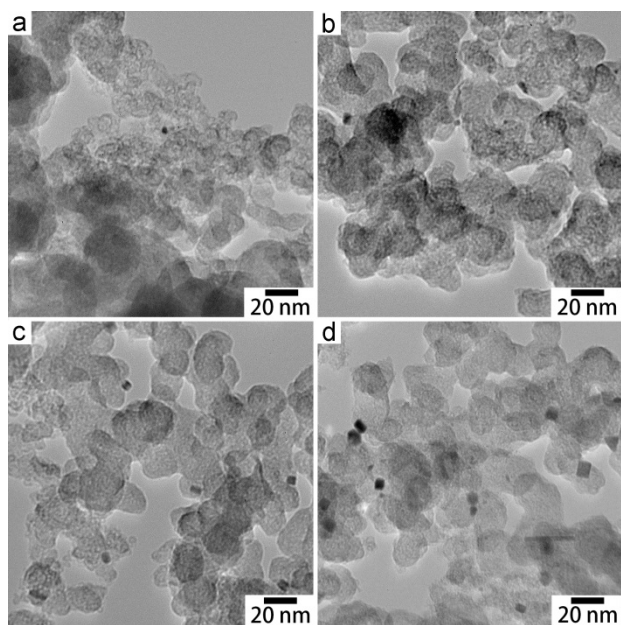

**Figure S4.** TEM images of Pt/C samples obtained after (a) 10 min, (b) 30 min, (c) 60 min, (d) 180 min of reduction at 150 °C in  $5/120 \text{ cm}^3/\text{min}$   $\text{H}_2/\text{CO}$ .

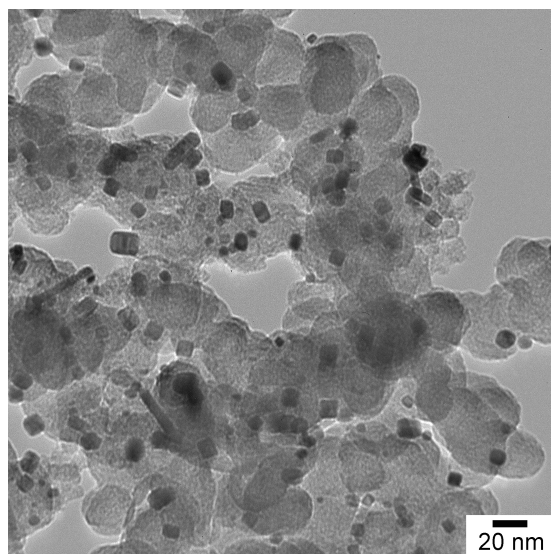

**Figure S5.** TEM of produced PtNCs/C containing 20 wt.% Pt. Pt reduction condition:  $\text{H}_2/\text{CO} = 5/120 \text{ cm}^3/\text{min}$ ,  $T = 200^\circ\text{C}$ , and  $t = 1 \text{ h}$ .

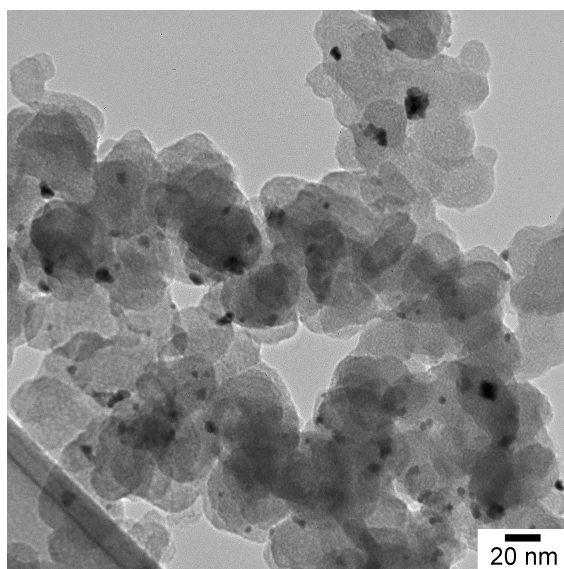

**Figure S6.** TEM of the commercial Pt/C.

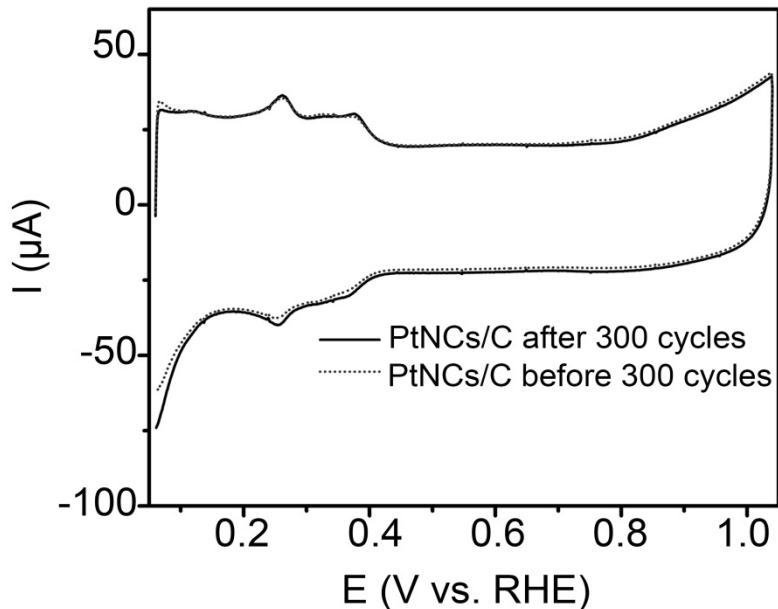

**Figure S7.** Comparison of cyclic voltammograms of PtNCs/C collected before and after the 300-cycle rapid scan treatment at 100 V/s in 0.5 M  $\text{H}_2\text{SO}_4$ .

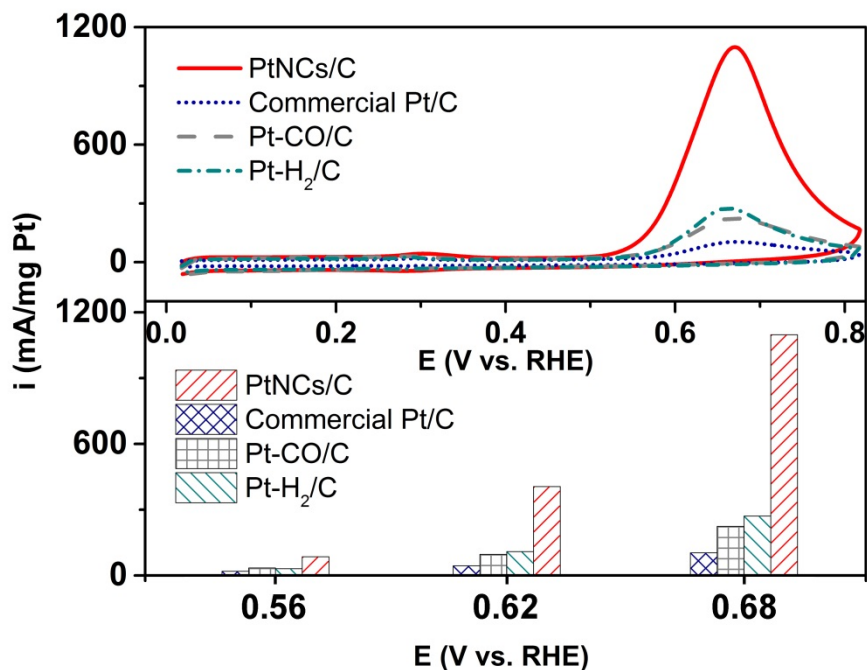

**Figure S8.** Cyclic voltammograms of PtNCs/C, Pt-CO/C, Pt-H<sub>2</sub>/C, and commercial Pt/C normalized by Pt mass. Electrolyte: 0.1 M  $\text{NH}_3$  + 1 M KOH; Potential scan rate: 50 mV/s; Electrode rotating rate: 1600 rpm.

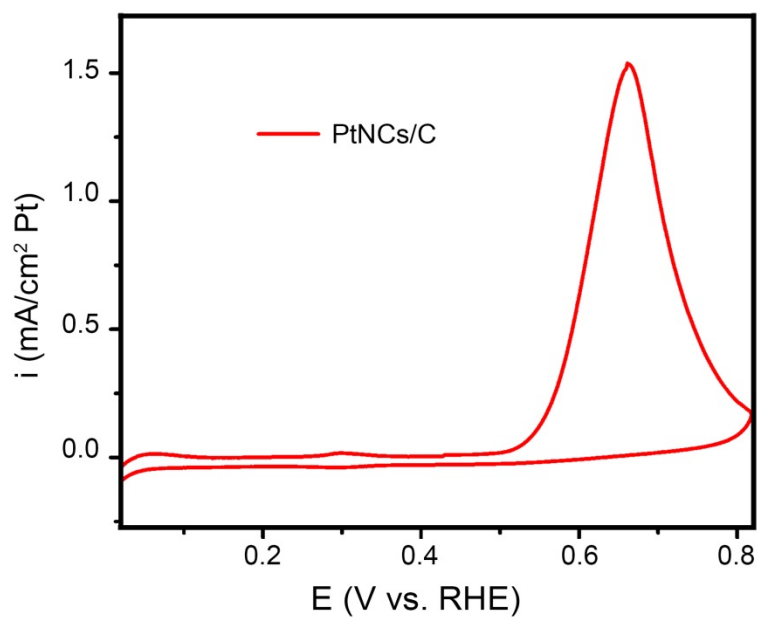

**Figure S9.** Cyclic voltammetry of PtNCs/C normalized by Pt electrochemically active surface area. Electrolyte: 0.1 M  $\text{NH}_3$  + 1 M KOH; Potential scan rate: 10 mV/s; Electrode rotating rate: 1600 rpm.
